# Supplementary material
Source: publisher site journal article supplement (https://www.dovepress.com/get_supplementary_file.php?f=498202.xlsx)
Supplement: Supplementary file 1 [file get_supplementary_file.php]

## Sheet: supplementary table 1
supplementary table 1
OARSI scoring criteria (Articular cartilage)
Category	Score
Structure
Normal	0
Very Minimal Degeneration:proteoglycan loss without structural changes	0.5
Minimal Degeneration: Small surface to subsurface fibrillations without major loss of chondrocytes or cartilage matrix, may have small focal area of chondrocyte loss extending partial thickness over less than 5% of total surface	1
Mild Degeneration: Vertical clefts down to the layer immediately below the superficial layer with few extending deeper and some loss of surface matrix, or focal areas of chondrocyte/proteoglycan loss with good collagen preservation extending partial thickness over 5 to 10% of the surface	2
Moderate Degeneration: Vertical clefts/erosion to the calcified cartilage extending over <25% of the articular surface, or focal areas of chondrocyte/proteoglycan loss with some collagen preservation extending full thickness over 10 to 24% of the surface	3
Marked Degeneration: Vertical clefts/erosion to the calcified cartilage extending over 25 to 50% of the articular surface, or focal areas of chondrocyte/proteoglycan loss with some collagen preservation extending full thickness over 25 to 50% of the surface	4
Severe Degeneration: Vertical clefts/erosion to the calcified cartilage extending over 50 to 75% of the articular surface, or focal areas of chondrocyte/proteoglycan loss with some collagen preservation extending full thickness over 50 to 75% of the surface	5
Very Severe Degeneration: Vertical clefts/erosion to the calcified cartilage extending >75% of the articular surface, may be few areas of acellular collagen remaining	6
OARSI scoring criteria (osteophyte)
Category Score
largest osteophyte <150 µm	1
151< largest osteophyte <300 µm	2
largest osteophyte >300	3

## Sheet: Supplementary Table 2
Supplementary Table 2.a								Supplementary Table 2.d
Lequesne MG raw data								Lequesne MG raw data
pre-intervention	group	Score	Pain	Gait	Joint movement	Joint swelling		Post-intervention	group	Score	Pain	Gait	Joint movement	Joint swelling
	control1	0	0	0	0	0			control1	0	0	0	0	0
	control2	0	0	0	0	0			control2	0	0	0	0	0
	control3	1	0	1	0	0			control3	1	0	1	0	0
	control4	0	0	0	0	0			control4	0	0	0	0	0
	control5	0	0	0	0	0			control5	0	0	0	1	0
	OA1	6	2	2	1	1			OA1	7	1	3	1	2
	OA2	7	3	1	1	2			OA2	6	2	1	2	1
	OA3	6	2	1	1	2			OA3	7	2	1	2	2
	OA4	7	2	3	1	1			OA4	5	1	2	1	1
	OA5	7	1	2	2	2			OA5	6	2	1	2	1
	Treatment1	7	3	1	2	1			Treatment1	5	1	1	2	1
	Treatment2	6	1	1	2	2			Treatment2	4	1	1	1	1
	Treatment3	7	2	3	1	1			Treatment3	4	1	1	1	1
	Treatment4	7	2	1	2	2			Treatment4	3	1	0	1	1
	Treatment5	6	2	1	2	1			Treatment5	3	1	1	1	0
Supplementary Table 2.b								Supplementary Table 2.e
Lequesne MG raw data								Lequesne MG raw data
pre-intervention	group	Score	Pain	Gait	Joint movement	Joint swelling		Post-intervention	group	Score	Pain	Gait	Joint movement	Joint swelling
	control1	0	0	0	0	0			control1	0	0	0	0	0
	control2	0	0	0	0	0			control2	0	0	0	0	0
	control3	1	0	1	0	0			control3	1	0	1	0	0
	control4	0	0	0	0	0			control4	0	0	0	0	0
	control5	0	0	0	0	0			control5	0	0	0	1	0
	OA1	6	1	3	1	1			OA1	7	1	3	1	2
	OA2	6	2	1	1	2			OA2	6	2	1	2	1
	OA3	7	2	1	2	2			OA3	7	2	1	2	2
	OA4	7	2	3	1	1			OA4	5	1	2	1	1
	OA5	7	1	2	2	2			OA5	6	2	1	2	1
	Treatment1	7	3	1	2	1			Treatment1	5	1	1	2	1
	Treatment2	6	1	2	1	2			Treatment2	4	1	1	1	1
	Treatment3	7	2	3	1	1			Treatment3	4	1	1	1	1
	Treatment4	7	2	2	2	1			Treatment4	3	1	0	1	1
	Treatment5	6	2	1	1	2			Treatment5	3	1	1	1	0
Supplementary Table 2.c								Supplementary Table 2.f
Lequesne MG raw data								Lequesne MG raw data
pre-intervention	group	Score	Pain	Gait	Joint movement	Joint swelling		Post-intervention	group	Score	Pain	Gait	Joint movement	Joint swelling
	control1	0	0	0	0	0			control1	0	0	0	0	0
	control2	0	0	0	0	0			control2	0	0	0	0	0
	control3	1	0	1	0	0			control3	1	0	1	0	0
	control4	0	0	0	0	0			control4	0	0	0	0	0
	control5	0	0	0	0	0			control5	0	0	0	1	0
	OA1	6	1	3	1	1			OA1	7	1	3	1	2
	OA2	6	2	1	1	2			OA2	6	2	1	2	1
	OA3	7	2	2	1	2			OA3	7	2	1	2	2
	OA4	7	2	3	1	1			OA4	5	1	2	1	1
	OA5	7	1	2	2	2			OA5	6	2	1	2	1
	Treatment1	7	2	2	2	1			Treatment1	5	1	1	2	1
	Treatment2	6	1	2	1	2			Treatment2	4	1	1	1	1
	Treatment3	7	2	3	1	1			Treatment3	4	1	1	1	1
	Treatment4	7	2	2	2	1			Treatment4	3	1	0	1	1
	Treatment5	6	2	2	1	1			Treatment5	3	1	1	1	0

## Sheet: Supplementary Table 3
Supplementary Table 3.a			Supplementary Table 3.b			Supplementary Table 3.c
Mankins raw data			Mankins raw data			Mankins raw data
group	Score		group	Score		group	Score
control1	0		control1	0		control1	0
control2	0		control2	0		control2	0
control3	1		control3	1		control3	1
control4	0		control4	0		control4	0
control5	0		control5	0		control5	0
OA1	3		OA1	3		OA1	3
OA2	3		OA2	3		OA2	3
OA3	4		OA3	3		OA3	4
OA4	3		OA4	4		OA4	3
OA5	4		OA5	4		OA5	4
Treatment1	1		Treatment1	1		Treatment1	1
Treatment2	2		Treatment2	1		Treatment2	1
Treatment3	1		Treatment3	2		Treatment3	1
Treatment4	2		Treatment4	2		Treatment4	2
Treatment5	2		Treatment5	2		Treatment5	3

## Sheet: Supplementary Table 4
Supplementary Table 4.a						Supplementary Table 4.b						Supplementary Table 4.c						Supplementary Table 4.d						Supplementary Table 4.f
TWL raw data						TWL raw data						TWL raw data						TWL raw data						TWL raw data
0day	First foot reduction time	Second foot reduction time	Third foot reduction time	average value		28day	First foot reduction time	Second foot reduction time	Third foot reduction time	average value		35day	First foot reduction time	Second foot reduction time	Third foot reduction time	average value		42day	First foot reduction time	Second foot reduction time	Third foot reduction time	average value		56day	First foot reduction time	Second foot reduction time	Third foot reduction time	average value
control1	25.13	25.14	24.56	24.9433		control1	25.46	25.34	25.75	25.5167		control1	25.29	25.23	25.02	25.18		control1	25.83	24.5	24.12	24.8167		control1	24.85	25.56	23.88	24.7633
control2	24.87	24.92	25.44	25.0767		control2	24.83	24.67	24.94	24.8133		control2	23.78	24.42	23.81	24.0033		control2	24.15	23.95	23.59	23.8967		control2	25.73	23.79	25.42	24.98
control3	25.56	25.67	25.34	25.5233		control3	25.64	25.82	25.29	25.5833		control3	25.36	25.7	25.6	25.5533		control3	25.05	25.27	25.99	25.4367		control3	23.92	24.23	24.3	24.15
control4	24.72	24.75	24.77	24.7467		control4	25.12	24.56	25.12	24.9333		control4	23.54	24.1	24.33	23.99		control4	23.61	26	24.68	24.7633		control4	25.11	25.63	25.72	25.4867
control5	25.34	25.43	25.89	25.5533		control5	24.99	25.01	25.88	25.2933		control5	24.82	24.67	23.66	24.3833		control5	25.48	25.14	24.97	25.1967		control5	24.67	24.99	23.67	24.4433
OA1	25.91	25.91	25.02	25.6133		OA1	8.22	7.88	8.89	8.33		OA1	7.23	7.67	7.45	7.45		OA1	6.23	5.76	5.64	5.87667		OA1	5.67	5.52	5.89	5.69333
OA2	24.68	24.53	25.73	24.98		OA2	7.89	8.33	8.3	8.17333		OA2	6.81	6.75	6.98	6.84667		OA2	5.89	6.84	6.78	6.50333		OA2	4.83	5.37	4.68	4.96
OA3	25.48	25.29	24.88	25.2167		OA3	8.56	7.91	7.66	8.04333		OA3	7.56	7.12	7.19	7.29		OA3	6.45	5.93	6.31	6.23		OA3	5.14	4.91	5.4	5.15
OA4	25.02	25.85	25.36	25.41		OA4	7.64	8.68	7.54	7.95333		OA4	6.9	6.54	6.67	6.70333		OA4	5.76	6.58	5.54	5.96		OA4	5.29	5.76	4.79	5.28
OA5	25.79	24.65	24.54	24.9933		OA5	8.43	8.02	8.12	8.19		OA5	7.34	7.88	6.8	7.34		OA5	6.84	6.01	5.88	6.24333		OA5	4.72	4.54	5.02	4.76
Treatment1	24.55	25.78	25.21	25.18		Treatment1	8.17	7.72	8.77	8.22		Treatment1	9.32	9.74	8.52	9.19333		Treatment1	10.23	11.15	10.54	10.64		Treatment1	13.45	15.38	14.35	14.3933
Treatment2	25.22	25.11	25.01	25.1133		Treatment2	7.75	8.45	7.98	8.06		Treatment2	9.87	8.61	9.63	9.37		Treatment2	11.48	10.76	11.33	11.19		Treatment2	14.32	16.56	15.62	15.5
Treatment3	24.94	24.99	25.74	25.2233		Treatment3	8.99	8.04	8.21	8.41333		Treatment3	8.75	9.56	9.12	9.14333		Treatment3	10.67	10.34	10.9	10.6367		Treatment3	15.21	15.85	17.58	16.2133
Treatment4	25.67	25.12	24.59	25.1267		Treatment4	7.56	7.59	8.36	7.83667		Treatment4	9.45	8.99	9.99	9.47667		Treatment4	11.92	11.06	11.08	11.3533		Treatment4	16.32	17.65	18.62	17.53
Treatment5	25.31	25.68	25.9	25.63		Treatment5	8.01	8.71	8.14	8.28667		Treatment5	9.01	9.24	8.68	8.97667		Treatment5	10.85	11.74	10.15	10.9133		Treatment5	14.2	15.49	13.35	14.3467

## Sheet: Supplementary Table 5
Supplementary Table 5.a							Supplementary Table 5.b							Supplementary Table 5.c
OARSI raw data							OARSI raw data							OARSI raw data
group	Medial femoral condyle	Lateral femoral condyle	Medial tibial plateau	Lateral tibial plateau	Total Score		group	Medial femoral condyle	Lateral femoral condyle	Medial tibial plateau	Lateral tibial plateau	Total Score		group	Medial femoral condyle	Lateral femoral condyle	Medial tibial plateau	Lateral tibial plateau	Total Score
control1	1	0	0	1	2		control1	1	0	0	0.5	1.5		control1	1	0	0	0.5	1.5
control2	1	0	0.5	0.5	2		control2	1	0	1	0.5	2.5		control2	1	0	1	0.5	2.5
control3	1	0	1	0.5	2.5		control3	1	0	1	0.5	2.5		control3	1	0	1	0.5	2.5
control4	0	0	1	0.5	1.5		control4	0	0	1	0.5	1.5		control4	0	0	1	0.5	1.5
control5	1	0.5	0.5	0.5	2.5		control5	1	0.5	0.5	0.5	2.5		control5	1	0.5	0.5	0.5	2
OA1	3	2	3	5	13		OA1	3	2	3	5	13		OA1	3	2	3	5	13
OA2	4	2	4	2	12		OA2	4	2	4	3	13		OA2	4	2	4	3	13
OA3	5	4	2	3	14		OA3	5	4	2	3	14		OA3	5	4	2	3	14
OA4	4	3	5	4	16		OA4	4	3	5	3	15		OA4	4	4	4	3	15
OA5	3	2	4	3	12		OA5	3	2	4	3	12		OA5	3	2	4	3	12
Treatment1	3	2	3	2	10		Treatment1	3	2	3	2	10		Treatment1	3	2	3	2	10
Treatment2	2	2	1	3	8		Treatment2	2	2	1	3	8		Treatment2	2	2	1	2	7
Treatment3	3	1	1	2	7		Treatment3	3	1	2	2	8		Treatment3	3	1.5	1	2.5	8
Treatment4	2	2	3	2	9		Treatment4	2	2	3	2	9		Treatment4	2	1	3	3	9
Treatment5	3	2	3	1	9		Treatment5	3	2	2	1	8		Treatment5	3	2	2	1	8

## Sheet: Supplementary Table 6
				cAMP
Supplementary Table 6.a
Original sample absorbance value
	1	2	3	4	5	6	7	8	9	10	11	12
A	0.069	0.342	0.608	0.981	1.525	2.035
B	0.634	0.632	0.631	0.62	0.608	0.613	0.63	0.635	0.633	0.635	0.638	0.645
C	0.613	0.607	0.605	0.64	0.649	0.644	0.695	0.689	0.696	0.676	0.682	0.681
D	0.725	0.717	0.715	0.7	0.697	0.695	0.765	0.759	0.754	0.752	0.756	0.753
E	0.802	0.808	0.796	0.76	0.745	0.752	0.76	0.768	0.752
Supplementary Table 6.b
Correspondence table of test samples
	1	2	3	4	5	6	7	8	9	10	11	12
A	S0	S1	S2	S3	S4	S5
B	OA1	OA1	OA1	OA2	OA2	OA2	OA3	OA3	OA3	OA4	OA4	OA4
C	OA5	OA5	OA5	Treatment1	Treatment1	Treatment1	Treatment2	Treatment2	Treatment2	Treatment3	Treatment3	Treatment3
D	Treatment4	Treatment4	Treatment4	Treatment5	Treatment5	Treatment5	control1	control1	control1	control2	control2	control2
E	control3	control3	control3	control4	control4	control4	control5	control5	control5
Supplementary Table 6.c
Reference Standard	Concentration of standard (nmol/L)	OD value of standard
S0	0	0.069
S1	2	0.342
S2	4	0.608
S3	8	0.981
S4	16	1.525
S5	32	2.035
Supplementary Table 6.d
y = (A - D) / [1 + (x/C)^B] + D
A = 2.97962
B = -1.08029
C = 16.18287
D = 0.06960
r^2 = 0.99983
Supplementary Table 6.e
Concentration (nmol/L) corresponding to the absorbance value of the original sample
	1	2	3	4	5	6	7	8	9	10	11	12
A
B	4.32881	4.3112	4.30241	4.20608	4.10182	4.14516	4.29362	4.33762	4.32	4.33762	4.36409	4.42606
C	4.14516	4.09317	4.07589	4.38176	4.46161	4.41719	4.87775	4.82269	4.88695	4.70421	4.75876	4.74965
D	5.15667	5.08169	5.06301	4.92381	4.89615	4.87775	5.53837	5.48038	5.43225	5.41305	5.45148	5.42265
E	5.90195	5.9619	5.84228	5.49002	5.34608	5.41305	5.49002	5.56746	5.41305
Supplementary Table 6.f
Concentration value (nmol/L) of the sample after multiplying by the dilution factor (5x)
	1	2	3	4	5	6	7	8	9	10	11	12
A
B	21.644	21.556	21.512	21.0304	20.5091	20.7258	21.4681	21.6881	21.6	21.6881	21.8204	22.1303
C	20.7258	20.4659	20.3794	21.9088	22.3081	22.086	24.3887	24.1135	24.4347	23.5211	23.7938	23.7483
D	25.7834	25.4084	25.3151	24.6191	24.4808	24.3887	27.6918	27.4019	27.1613	27.0653	27.2574	27.1132
E	29.5097	29.8095	29.2114	27.4501	26.7304	27.0653	27.4501	27.8373	27.0653

## Sheet: Supplementary Table 7
				MMP-3
Supplementary Table 7.a
Original sample absorbance value
	1	2	3	4	5	6	7	8	9	10	11	12
A	0.075	0.327	0.574	1.009	1.548	2.061
B	0.593	0.585	0.584	0.591	0.589	0.59	0.569	0.563	0.56	0.583	0.588	0.581
C	0.582	0.588	0.589	0.679	0.684	0.677	0.689	0.682	0.685	0.676	0.671	0.675
D	0.688	0.682	0.681	0.679	0.681	0.684	0.619	0.613	0.615	0.638	0.636	0.641
E	0.666	0.661	0.67	0.619	0.615	0.614	0.637	0.634	0.635
Supplementary Table 7.b
Correspondence table of test samples
	1	2	3	4	5	6	7	8	9	10	11	12
A	S0	S1	S2	S3	S4	S5
B	control1	control1	control1	control2	control2	control2	control3	control3	control3	control4	control4	control4
C	control5	control5	control5	OA1	OA1	OA1	OA2	OA2	OA2	OA3	OA3	OA3
D	OA4	OA4	OA4	OA5	OA5	OA5	treatment1	treatment1	treatment1	treatment2	treatment2	treatment2
E	treatment3	treatment3	treatment3	treatment4	treatment4	treatment4	treatment5	treatment5	treatment5
Supplementary Table 7.c
Reference Standard	Concentration of standard (μg/L)	OD value of standard
S0	0	0.075
S1	2.5	0.327
S2	5	0.574
S3	10	1.009
S4	20	1.548
S5	40	2.061
Supplementary Table 7.d
y = (A - D) / [1 + (x/C)^B] + D
A = 2.80091
B = -1.18705
C = 17.42416
D = 0.07570
r^2 = 0.99997
Supplementary Table 7.e
Concentration corresponding to the absorbance value of the original sample (μg/L)
	1	2	3	4	5	6	7	8	9	10	11	12
A
B	5.13121	5.04887	5.03861	5.1106	5.09	5.1003	4.88522	4.82419	4.79375	5.02834	5.07971	5.00783
C	5.01809	5.07971	5.09	6.03979	6.09404	6.01814	6.14844	6.07232	6.1049	6.00733	5.95335	5.99652
D	6.13755	6.07232	6.06147	6.03979	6.06147	6.09404	5.40126	5.33861	5.35947	5.60107	5.57994	5.63282
E	5.89954	5.84588	5.94257	5.40126	5.35947	5.34903	5.59051	5.55883	5.56938
Supplementary Table 7.f
Concentration value (μg/L) of the sample after multiplying by the dilution factor (5x)
	1	2	3	4	5	6	7	8	9	10	11	12
A
B	25.6561	25.2444	25.193	25.553	25.45	25.5015	24.4261	24.121	23.9687	25.1417	25.3986	25.0392
C	25.0904	25.3986	25.45	30.199	30.4702	30.0907	30.7422	30.3616	30.5245	30.0367	29.7668	29.9826
D	30.6877	30.3616	30.3074	30.199	30.3074	30.4702	27.0063	26.693	26.7973	28.0054	27.8997	28.1641
E	29.4977	29.2294	29.7129	27.0063	26.7973	26.7452	27.9525	27.7942	27.8469

## Sheet: Supplementary table 8
				MLT
Supplementary table 8.a
Original sample absorbance value
	1	2	3	4	5	6	7	8	9	10	11	12
A	0.071	0.324	0.581	1.031	1.604	2.059
B	0.483	0.487	0.491	0.437	0.444	0.439	0.472	0.476	0.465	0.453	0.444	0.446
C	0.348	0.344	0.351	0.493	0.498	0.501	0.52	0.517	0.523	0.539	0.54	0.538
D	0.504	0.498	0.506	0.495	0.499	0.498	0.551	0.552	0.546	0.551	0.547	0.553
E	0.552	0.545	0.546	0.556	0.549	0.552	0.546	0.543	0.551
Supplementary table 8.b
Correspondence table of test samples
	1	2	3	4	5	6	7	8	9	10	11	12
A	S0	S1	S2	S3	S4	S5
B	OA1	OA1	OA1	OA2	OA2	OA2	OA3	OA3	OA3	OA4	OA4	OA4
C	OA5	OA5	OA5	Treatment1	Treatment1	Treatment1	Treatment2	Treatment2	Treatment2	Treatment3	Treatment3	Treatment3
D	Treatment4	Treatment4	Treatment4	Treatment5	Treatment5	Treatment5	control1	control1	control1	control2	control2	control2
E	control3	control3	control3	contro4	contro4	contro4	contro5	contro5	contro5
Supplementary table 8.c
Reference Standard	Concentration of standard (ng/L)	OD value of standard
S0	0	0.071
S1	3	0.324
S2	6	0.581
S3	12	1.031
S4	24	1.604
S5	48	2.059
Supplementary table 8.d
y = (A - D) / [1 + (x/C)^B] + D
A = 2.60638
B = -1.28540
C = 17.50919
D = 0.07540
r^2 = 0.99988
Supplementary table 8.e
Concentration corresponding to the absorbance value of the original sample (ng/L)
	1	2	3	4	5	6	7	8	9	10	11	12
A
B	4.84865	4.8928	4.937	4.34431	4.4207	4.36612	4.7275	4.77151	4.6506	4.51908	4.4207	4.44254
C	3.37969	3.33645	3.41212	4.95913	5.01449	5.04775	5.25917	5.2257	5.29268	5.47201	5.48325	5.46077
D	5.08104	5.01449	5.10326	4.98126	5.02557	5.01449	5.60723	5.61852	5.55081	5.60723	5.56208	5.62982
E	5.61852	5.53954	5.55081	5.66376	5.58465	5.61852	5.55081	5.51701	5.60723
Supplementary table 8.f
Concentration value (ng/L) of the sample after multiplying by the dilution factor (5x)
	1	2	3	4	5	6	7	8	9	10	11	12
A
B	24.2433	24.464	24.685	21.7215	22.1035	21.8306	23.6375	23.8576	23.253	22.5954	22.1035	22.2127
C	16.8985	16.6823	17.0606	24.7956	25.0724	25.2387	26.2959	26.1285	26.4634	27.3601	27.4163	27.3039
D	25.4052	25.0724	25.5163	24.9063	25.1279	25.0724	28.0361	28.0926	27.754	28.0361	27.8104	28.1491
E	28.0926	27.6977	27.754	28.3188	27.9232	28.0926	27.754	27.5851	28.0361

## Sheet: supplementary table 9
supplementary table 9
AANAT raw data
Group	sample number	AANAT Ct	GAPDH ct	△ct	control sample	△△ct	2^-△△ct
Control	Control1	27.4145	22.0939	5.3206	5.3106	0.00999896	0.993093
	Control1	27.4853	22.1919	5.29341	5.3106	-0.0171846	1.01198
	Control1	27.5247	22.207	5.31778	5.3106	0.00718562	0.995032
	Control2	27.3508	22.0363	5.31453	5.29889	0.0156415	0.989217
	Control2	27.4034	22.1182	5.28523	5.29889	-0.0136637	1.00952
	Control2	27.4326	22.1356	5.29691	5.29889	-0.00197779	1.00137
	Control3	30.1027	20.9626	9.14009	9.10659	0.0335017	0.977046
	Control3	30.1364	21.0475	9.08896	9.10659	-0.0176286	1.01229
	Control3	30.1693	21.0786	9.09072	9.10659	-0.0158731	1.01106
	Control4	30.1107	20.9778	9.13287	9.12335	0.00952822	0.993417
	Control4	30.1309	21.0197	9.11125	9.12335	-0.0120984	1.00842
	Control4	30.1691	21.0432	9.12592	9.12335	0.00257022	0.99822
	Control5	27.536	22.2175	5.31851	5.31962	-0.0011097	1.00077
	Control5	27.5391	22.2435	5.29559	5.31962	-0.0240242	1.01679
	Control5	27.6229	22.2781	5.34475	5.31962	0.0251339	0.982729
OA	OA1	26.7196	22.7568	3.96282	5.3106	-1.34778	2.54519
	OA1	26.7374	22.8012	3.93622	5.3106	-1.37438	2.59256
	OA1	26.8147	22.8042	4.01056	5.3106	-1.30003	2.46235
	OA2	27.2712	22.7742	4.49697	5.29889	-0.801916	1.74341
	OA2	27.2903	22.8159	4.47441	5.29889	-0.824475	1.77089
	OA2	27.3492	22.8281	4.52113	5.29889	-0.777763	1.71447
	OA3	26.9343	21.9701	4.96421	9.10659	-4.14238	17.6596
	OA3	26.9602	21.9847	4.97548	9.10659	-4.13111	17.5222
	OA3	26.9615	21.9937	4.96777	9.10659	-4.13882	17.6161
	OA4	28.3686	22.3777	5.99089	5.31962	0.67127	0.627954
	OA4	28.3987	22.3812	6.01754	5.31962	0.69792	0.61646
	OA4	28.438	22.3955	6.04243	5.31962	0.722817	0.605913
	OA5	27.6777	24.8043	2.87331	5.31962	-2.44631	5.45021
	OA5	27.7052	24.8471	2.85806	5.31962	-2.46156	5.50812
	OA5	27.732	24.8585	2.87342	5.31962	-2.4462	5.44977
Trratment	Treatment1	27.4361	24.256	3.18004	5.3106	-2.13055	4.37886
	Treatment1	27.4934	24.2655	3.22796	5.3106	-2.08264	4.23581
	Treatment1	27.5078	24.3251	3.18263	5.3106	-2.12796	4.371
	Treatment2	27.9976	23.5169	4.48068	5.29889	-0.818213	1.76322
	Treatment2	28.0827	23.5601	4.5226	5.29889	-0.776289	1.71272
	Treatment2	28.1168	23.5759	4.54089	5.29889	-0.757999	1.69114
	Treatment3	27.6428	22.0685	5.57428	9.10659	-3.53231	11.5699
	Treatment3	27.6919	22.1102	5.58162	9.10659	-3.52497	11.5112
	Treatment3	27.7146	22.1514	5.56325	9.10659	-3.54334	11.6588
	Treatment4	28.4396	22.2743	6.16534	9.12335	-2.95801	7.7705
	Treatment4	28.4587	22.3382	6.12049	9.12335	-3.00285	8.01584
	Treatment4	28.504	22.3395	6.16455	9.12335	-2.95879	7.77474
	Treatment5	29.0196	25.2891	3.73048	9.12335	-5.39286	42.0158
	Treatment5	29.093	25.3308	3.76217	9.12335	-5.36118	41.1032
	Treatment5	29.1157	25.3621	3.75365	9.12335	-5.36969	41.3464

## Sheet: supplementary table 10
supplementary table 10
MT1 raw data
Group	sample number	AANAT Ct	GAPDH ct	△ct	control sample	△△ct	2^-△△ct
Control	Control1	29.757	23.3573	6.39971	6.38295	0.0167617	0.988449
	Control1	29.7752	23.3789	6.3963	6.38295	0.0133567	0.990785
	Control1	29.8161	23.4633	6.35283	6.38295	-0.0301183	1.0211
	Control2	29.6627	23.3629	6.2998	6.27601	0.0237905	0.983645
	Control2	29.6857	23.4216	6.26406	6.27601	-0.011954	1.00832
	Control2	29.6918	23.4276	6.26417	6.27601	-0.0118365	1.00824
	Control3	29.5449	23.4491	6.09586	6.10595	-0.0100909	1.00702
	Control3	29.5853	23.4954	6.09	6.10595	-0.0159533	1.01112
	Control3	29.6414	23.5094	6.13199	6.10595	0.0260442	0.982109
	Control4	30.103	23.2422	6.86079	6.86907	-0.00827408	1.00575
	Control4	30.1406	23.2532	6.88738	6.86907	0.0183079	0.98739
	Control4	30.1433	23.2843	6.85903	6.86907	-0.0100338	1.00698
	Control5	30.1479	23.2215	6.92634	6.9613	-0.0349555	1.02453
	Control5	30.1857	23.2241	6.96158	6.9613	0.000282796	0.999804
	Control5	30.2241	23.2281	6.99597	6.9613	0.0346727	0.976253
OA	OA1	28.3549	23.86	4.49495	6.38295	-1.888	3.70122
	OA1	28.3614	23.8693	4.4921	6.38295	-1.89085	3.70853
	OA1	28.4277	23.9256	4.50205	6.38295	-1.8809	3.68305
	OA2	28.3133	23.8809	4.4324	6.27601	-1.84361	3.58907
	OA2	28.3419	23.8981	4.44376	6.27601	-1.83225	3.56091
	OA2	28.3718	23.9046	4.46721	6.27601	-1.8088	3.5035
	OA3	27.9926	23.7851	4.20749	6.10595	-1.89846	3.72814
	OA3	27.9999	23.7858	4.21413	6.10595	-1.89182	3.71102
	OA3	28.0773	23.8085	4.26881	6.10595	-1.83714	3.57301
	OA4	28.0606	22.6216	5.439	6.86907	-1.43006	2.69459
	OA4	28.1598	22.6685	5.49135	6.86907	-1.37772	2.59857
	OA4	28.1611	22.6689	5.49212	6.86907	-1.37695	2.59718
	OA5	28.0435	22.7092	5.33431	6.9613	-1.62699	3.08867
	OA5	28.0435	22.7213	5.3222	6.9613	-1.63909	3.1147
	OA5	28.0787	22.7319	5.34681	6.9613	-1.61449	3.06203
Treatment	Treatment1	27.4455	23.359	4.08648	6.38295	-2.29647	4.91254
	Treatment1	27.4551	23.4564	3.99872	6.38295	-2.38423	5.22064
	Treatment1	27.5214	23.4806	4.04075	6.38295	-2.34219	5.07073
	Treatment2	27.4266	23.3924	4.0342	6.27601	-2.24181	4.72991
	Treatment2	27.4278	23.4124	4.01546	6.27601	-2.26055	4.79173
	Treatment2	27.5309	23.4757	4.05523	6.27601	-2.22078	4.66144
	Treatment3	27.4612	23.3052	4.15598	6.10595	-1.94996	3.86365
	Treatment3	27.5321	23.3563	4.17579	6.10595	-1.93016	3.81096
	Treatment3	27.5789	23.3674	4.21143	6.10595	-1.89452	3.71798
	Treatment4	27.492	23.2319	4.26011	6.86907	-2.60896	6.10062
	Treatment4	27.4921	23.26	4.23208	6.86907	-2.63699	6.22032
	Treatment4	27.5516	23.3099	4.24172	6.86907	-2.62735	6.17889
	Treatment5	27.4133	23.2163	4.197	6.9613	-2.7643	6.79418
	Treatment5	27.4611	23.2568	4.20432	6.9613	-2.75698	6.75982
	Treatment5	27.5196	23.2816	4.23801	6.9613	-2.72328	6.60374

[truncated: 2 more sheets: supplementary table 11, supplementary table 12]
